# Supplementary material for: Bridging the gap between informatics and medicine upon medical school entry: Implementing a course on the Applicative Use of ICT
Source: PLOS journal article supplement (doi:10.1371/journal.pone.0194194), 2018-04-23
Supplement: S1 (10.1371/journal.pone.0194194.s001) [file journal.pone.0194194.s001]

**S1 Fig. Appearance of the Questionnaire regarding knowledge, use and attitudes towards ICT distributed to students at the beginning of the course “Applicative Use of ICT in Medicine” in the Moodle virtual learning environment.**

Please read and answer on every question presented below.

**Question #1**

Gender:

- ☐ Male ☐ Female

**Question #2**

Age, yrs:

**Question #3**

Previous education:

**Question #4**

Previous experience with e-learning?

- ☐ Yes ☐ No

**Question #4**

For next questions/statements please mark one out of 5 possible levels of agreement, from **1 (lowest grade/strong disagreement)** through **3 (neutral)** to **5 (highest grade/strong agreement)**.

|                                                  | 1                     | 2                     | 3                     | 4                     | 5                     |
|--------------------------------------------------|-----------------------|-----------------------|-----------------------|-----------------------|-----------------------|
| How would you grade your ability in informatics? | <input type="radio"/> | <input type="radio"/> | <input type="radio"/> | <input type="radio"/> | <input type="radio"/> |
| How would you grade your ability in computers?   | <input type="radio"/> | <input type="radio"/> | <input type="radio"/> | <input type="radio"/> | <input type="radio"/> |
| Medical students need informatics.               | <input type="radio"/> | <input type="radio"/> | <input type="radio"/> | <input type="radio"/> | <input type="radio"/> |
| Informatics is useful for doctors.               | <input type="radio"/> | <input type="radio"/> | <input type="radio"/> | <input type="radio"/> | <input type="radio"/> |
| Internet is needed during education.             | <input type="radio"/> | <input type="radio"/> | <input type="radio"/> | <input type="radio"/> | <input type="radio"/> |
| Computers make everyday life easier.             | <input type="radio"/> | <input type="radio"/> | <input type="radio"/> | <input type="radio"/> | <input type="radio"/> |

**Question #5**

Do you have internet access from home?

- ☐ Yes ☐ No

**Question #6**

How much time do you spent using internet daily?

- ☐ <2 hours ☐ 2-4 hours ☐ 4-6 hours ☐ >6 hours

**Question #7**

Do you use internet for information search?

- ☐ Yes ☐ No

**Question #8**

Do you use social networks?

- ☐ Yes ☐ No

**Question #9**

Do you use tablet?

- ☐ Yes ☐ No

**Question #10**

Do you use smartphone?

- ☐ Yes ☐ No

**Question #11**

Do you use smartphone for email?

- ☐ Yes ☐ No

**Question #12**

Do you use smartphone to watch lectures?

- ☐ Yes ☐ No

**Question #13**

Do you use smartphone for education\_information search?

- ☐ Yes ☐ No

**Question #14**

Do you use smartphone to read lecture notes?

- ☐ Yes ☐ No

**Question #15**

Do you use smartphone to share notes?

- ☐ Yes ☐ No

[Submit preview](#)
